# Supplementary material for: Oxidative stress in sperm affects the epigenetic reprogramming in early embryonic development
Source: PubMed Central journal article supplement (PMC6192351; doi:10.1186/s13072-018-0224-y), 2018-10-17
Supplement: 13072_2018_224_MOESM1_ESM.pdf [file 13072_2018_224_MOESM1_ESM.pdf]

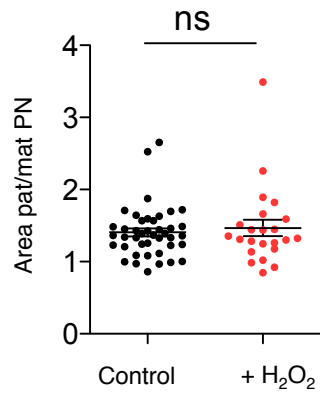

**Fig. S1 - Oxidative stress in sperm does not affect paternal genome decondensation in zygotes.** Quantification of the DAPI signal in the paternal and maternal pronuclei in zygotes from control and H<sub>2</sub>O<sub>2</sub>-treated groups.
